# Supplementary material
Source: Springer Nature journal article supplement (https://www.springermedizin.de/resource/supplementary/13098_2011_132_MOESM2_ESM.pdf/9670574)

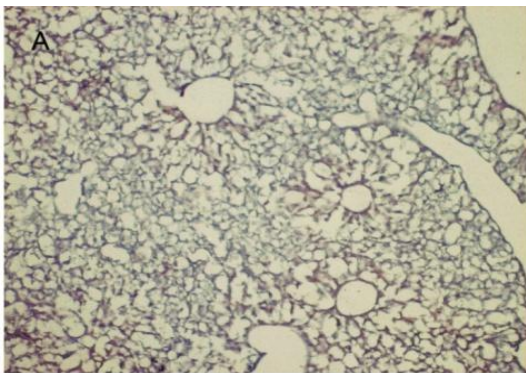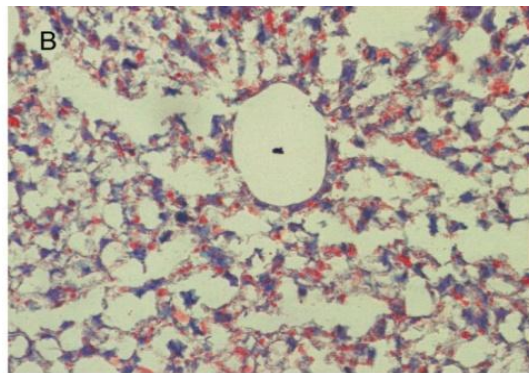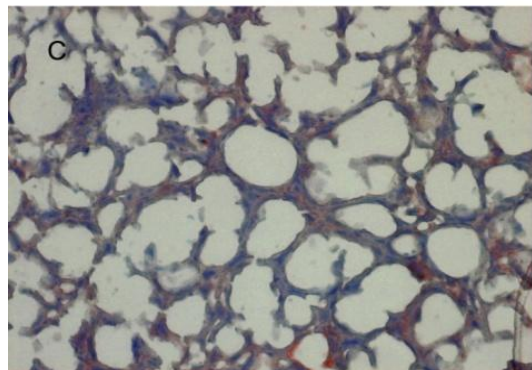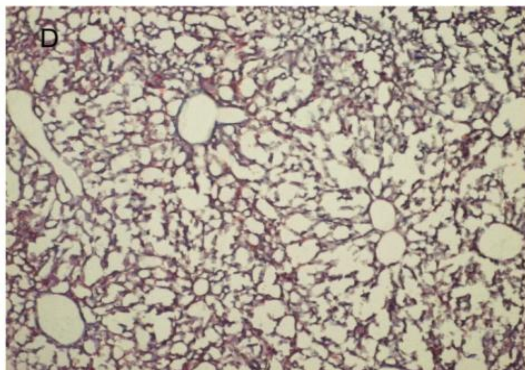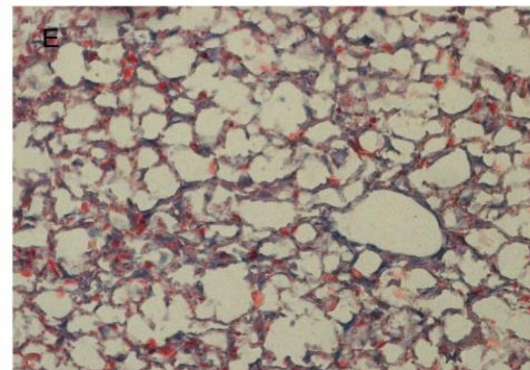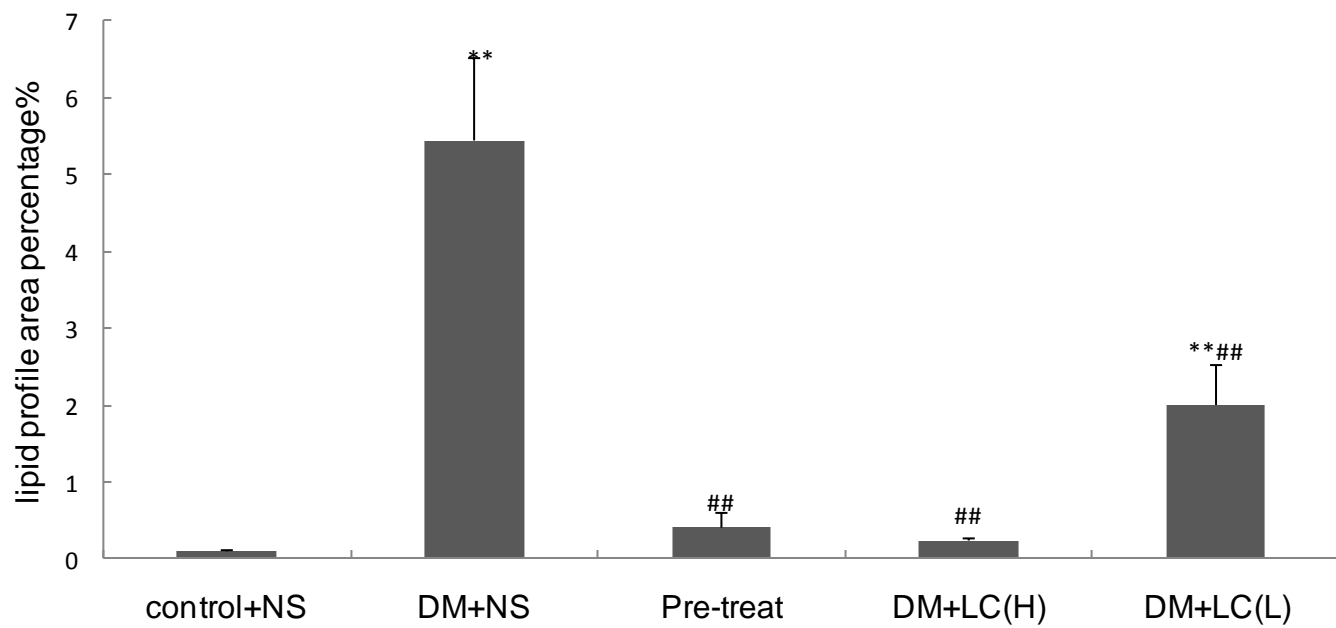

Supplement: MOESM2 [file 9670574]
